# Supplementary material for: Desensitized chimeric antigen receptor T cells selectively recognize target cells with enhanced antigen expression
Source: PubMed Central journal article supplement (PMC5794762; doi:10.1038/s41467-018-02912-x), 2018-02-01
Supplement: 41467_2018_2912_MOESM3_ESM.pdf [file 41467_2018_2912_MOESM3_ESM.pdf]

## Description of Additional Supplementary File

File Name: Supplementary Movie 1

Description: **Time-lapse video of apoptosis of EBV LCLs induced by MVR CAR T cells.** Cells from donors with different *HLA-DRB1* alleles exhibiting strong or weak binding to MVR ( $DR^{str}$  or  $DR^{weak}$ , respectively; **Fig. 1a**) were used. A time-lapse video was created from still images acquired during live-imaging analysis as described in **Fig. 4g**. Nineteen images taken at 5-min intervals from 0 to 90 min. EBV LCLs (blue fluorescence) undergoing apoptosis (red fluorescence) can be identified as cells with the merged magenta color. Upper left,  $DR^{weak}$  EBV LCLs + non-transduced (NT) T cells; upper middle,  $DR^{weak}$  EBV LCLs + CD19 CAR T cells; upper right,  $DR^{weak}$  EBV LCLs +  $DR^{weak}$  MVR CAR T cells; lower left,  $DR^{str}$  EBV LCLs + NT T cells; lower middle,  $DR^{str}$  EBV LCLs + CD19 CAR T cells; lower right,  $DR^{str}$  EBV LCLs +  $DR^{weak}$  MVR CAR T cells.
